# Supplementary material for: Stability of Monoclonal Antibodies as Solid Formulation for Auto-Injectors: A Pilot Study
Source: MDPI journal article supplement (doi:10.3390/pharmaceutics15082049), 2023-07-30
Supplement: s1 [file s1]

## Supplementary Materials

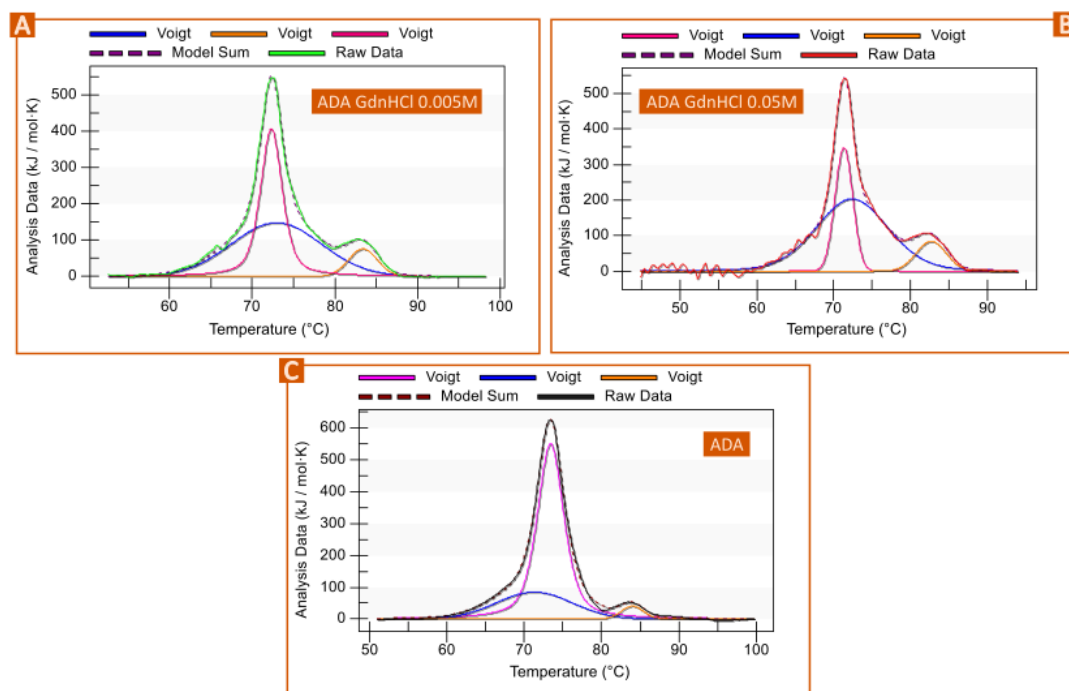

**Figure S1.** A) Mathematical deconvolution of ADA GdnHCl 0.005M, B) ADA GdnHCl 0.05M and C) commercial formulation, using Voigt model in all cases.

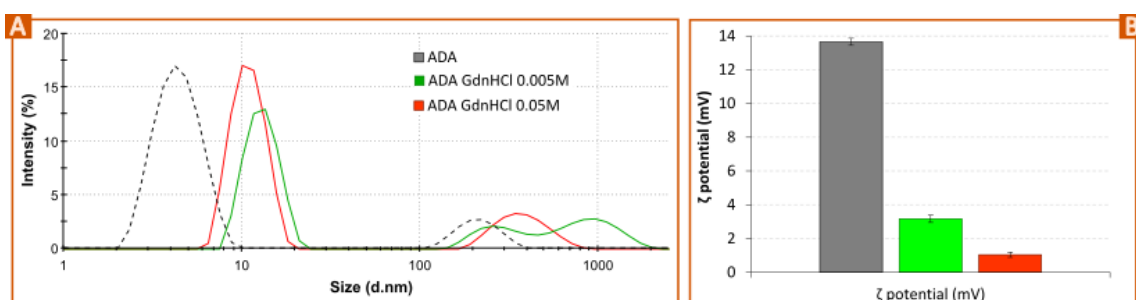

**Figure S2.** A) Hydrodynamic particle size (d.nm) and B)  $\zeta$ -potential (mV) of commercial sample (ADA), ADA GdnHCl 0.005 and 0.05 M.

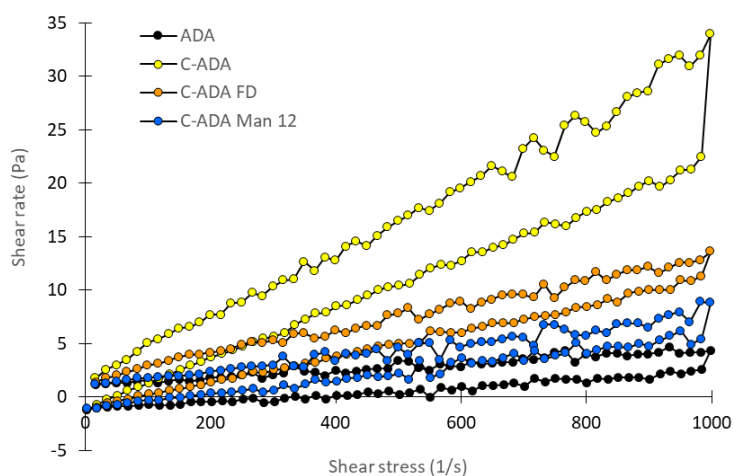

**Figure S3.** Flow curves (shear stress (1/s) vs shear rate (Pa)) of ADA, C-ADA, C-ADA FD and C-ADA Man 12 samples. All the samples possessed a thixotropic profile, the upper curve (10-1000 1/s having higher shear rate values than the downward-curve).
